# Supplementary material
Source: PubMed Central journal article supplement (PMC5849429)
Supplement: NIHMS859259-supplement-CCR_7-15-08.pdf [file NIHMS859259-supplement-CCR_7-15-08.pdf]

**Supplemental information**

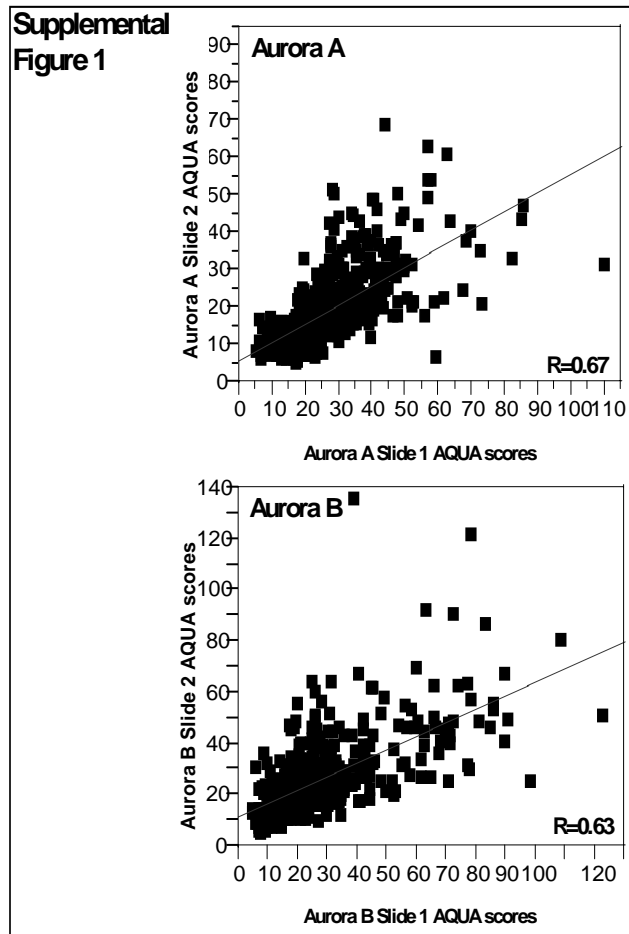

**Supplemental Figure 1.** Regression plots for AQUA scores from two sets of breast cancer arrays stained for Aurora A (A) and Aurora B (B).

**Supplemental Table 1. Association between Aurora A and Aurora B and breast cancer specific survival by Cox Univariate Analysis with 15 year follow-up**

| <b><u>Patient Group</u></b> | <b><u>AuroraA</u></b> |          | <b><u>Aurora B</u></b> |          |
|-----------------------------|-----------------------|----------|------------------------|----------|
|                             | <b>P value</b>        | <b>n</b> | <b>P value</b>         | <b>n</b> |
| Node Negative               | <b>0.0035</b>         | 267      | 0.4842                 | 253      |
| Node Positive               | 0.094                 | 266      | 0.2352                 | 264      |
| All                         | <b>0.0005</b>         | 533      | 0.9852                 | 517      |
